# Supplementary material for: Kinetic Analysis of Oxygen Evolution on Spin-Coated Thin-Film Electrodes via Electrochemical Impedance Spectroscopy
Source: MDPI journal article supplement (doi:10.3390/coatings13111957), 2023-11-16
Supplement: s1 [file s1]

# Supplementary Materials: Kinetic Analysis of Oxygen Evolution on Spin-coated Thin-film Electrodes by Electrochemical Impedance Spectroscopy

Yu-Wei Lin <sup>1†</sup>, Yi-Syuan Li <sup>1†</sup>, Chun-Wei Chang <sup>1</sup>, Li-Cheng Huang <sup>1</sup>, Tai-Hsin Yin <sup>1</sup>, Yu-Ting Liu <sup>1</sup>, Dong Kyoo Park <sup>2</sup>, Changsik Choi <sup>2,\*</sup> and YongMan Choi <sup>1,\*</sup>

<sup>1</sup> College of Photonics, National Yang Ming Chiao Tung University, Tainan 71150, Taiwan

<sup>2</sup> Clean Energy Conversion Research Center, Institute for Advanced Engineering, Yongin 17180, Republic of Korea

\* Correspondence: cschoi@iae.re.kr (C.C.); ymchoi@nycu.edu.tw (Y.C.)

† These authors contributed equally to this work.

**Table S1.** Comparison of HER activities of Pt/C.

| Electrocatalyst | Electrolyte                          | Overpotential@10mA/cm <sup>2</sup> (mV vs. RHE) | Substrate <sup>1</sup> | Year, Ref  |
|-----------------|--------------------------------------|-------------------------------------------------|------------------------|------------|
| Pt/C            | 0.1 M HClO <sub>4</sub>              | 71.3                                            | FTO                    | This work  |
| Commercial Pt/C | 0.5 M H <sub>2</sub> SO <sub>4</sub> | 14.9                                            | CP                     | 2023, [56] |
| Commercial Pt/C | 0.5 M H <sub>2</sub> SO <sub>4</sub> | 25                                              | CP                     | 2023, [57] |
| Commercial Pt/C | 0.5 M H <sub>2</sub> SO <sub>4</sub> | 36                                              | GCE                    | 2023, [58] |
| Commercial Pt/C | 0.5 M H <sub>2</sub> SO <sub>4</sub> | 30                                              | CP                     | 2023, [59] |
| Commercial Pt/C | 0.5 M H <sub>2</sub> SO <sub>4</sub> | 29                                              | GCE                    | 2023, [60] |
| Commercial Pt/C | 0.5 M H <sub>2</sub> SO <sub>4</sub> | 90                                              | Ti foil                | 2023, [61] |
| Commercial Pt/C | 0.5 M H <sub>2</sub> SO <sub>4</sub> | 28                                              | GCE                    | 2021, [62] |
| Commercial Pt/C | 0.1 M HClO <sub>4</sub>              | 50                                              | GCE                    | 2022, [63] |
| Pt/C            | 0.1 M HClO <sub>4</sub>              | 16.3                                            | RDE                    | 2022, [64] |

1. FTO, CP, GCE, and RDE are the substrates of fluorine-doped tin oxide glass, carbon fiber paper, glassy carbon electrodes, and rotating disk electrodes.

**Table S2.** Comparison of OER activities of IrO<sub>2</sub>-based electrocatalysts.

| Electrocatalyst             | Electrolyte                          | Overpotential@10mA/cm <sup>2</sup> (mV vs. RHE) | Substrate                           | Year, Ref  |
|-----------------------------|--------------------------------------|-------------------------------------------------|-------------------------------------|------------|
| IrO <sub>2</sub>            | 0.1 M HClO <sub>4</sub>              | 371.7                                           | FTO                                 | This work  |
| Commercial IrO <sub>2</sub> | 0.1M HClO <sub>4</sub>               | 347                                             | GCE                                 | 2023, [68] |
| Commercial IrO <sub>2</sub> | 0.5 M H <sub>2</sub> SO <sub>4</sub> | 295                                             | Ti                                  | 2023, [69] |
| IrO <sub>2</sub>            | 0.5 M H <sub>2</sub> SO <sub>4</sub> | 323                                             | FTO                                 | 2022, [70] |
| T- IrO <sub>2</sub>         | 0.1 M HClO <sub>4</sub>              | 197                                             | GCE                                 | 2021, [71] |
| C- IrO <sub>2</sub>         | 0.1 M HClO <sub>4</sub>              | 276                                             | GCE                                 | 2021, [71] |
| Np-IrO <sub>2</sub>         | 0.5 M H <sub>2</sub> SO <sub>4</sub> | 240                                             | self-supported nanoporous electrode | 2020, [72] |
| Commercial IrO <sub>2</sub> | 0.5 M H <sub>2</sub> SO <sub>4</sub> | 350                                             | GCE                                 | 2020, [73] |
| Commercial IrO <sub>2</sub> | 0.1 M HClO <sub>4</sub>              | 350                                             | GCE                                 | 2020, [74] |
| Commercial IrO <sub>2</sub> | 0.5 M H <sub>2</sub> SO <sub>4</sub> | 315                                             | GCE                                 | 2021, [75] |
| Commercial IrO <sub>2</sub> | 0.1 M HClO <sub>4</sub>              | 342                                             | GCE                                 | 2019, [76] |
| Commercial IrO <sub>2</sub> | 0.5 M H <sub>2</sub> SO <sub>4</sub> | 321                                             | GCE                                 | 2017, [77] |
